# Supplementary material for: Evaluation of the breast cancer disease burden in China from 1990 to 2021: based on the Global Burden of Disease Study 2021
Source: Research Square preprint supplement (doi:10.21203/rs.3.rs-6893644/v1), 2025-07-15
Supplement: Supplementary file 1 [file f35ea8070cf1d4a157d10760.docx]

**Supplementary Table 1** The Age-standardized rate of Mortality, Incidence, DALYs in 2021 for breast cancer in women to different regions in the world

| **Regions** | **ASIR (per 100,000)** | **ASMR (per 100,000)** | **ASDR (per 100,000)** |
| --- | --- | --- | --- |
| United States of America | 97.0 (91.0–101.3) | 17.2 (15.7–18.1) | 522.4 (490.8–554.9) |
| China | 37.0 (28.2–46.9) | 8.2 (6.4–10.3) | 281.5 (216.9–358.1) |
| India | 25.8 (21.9–30.6) | 12.4 (10.4–14.8) | 401.8 (339.3–480.0) |
| Japan | 63.8 (58.9–68.0) | 9.9 (9.2–10.6) | 353.0 (326.7–375.6) |
| Brazil | 43.9 (41.1–46.3) | 16.9 (15.7–18.0) | 532.5 (500.4–562.1) |
| United Kingdom | 89.0 (83.6–93.5) | 17.5 (16.5–18.5) | 545.7 (514.6–574.2) |
| Australia | 79.3 (70.1–89.0) | 15.1 (13.2–16.9) | 449.6 (403.2–500.0) |

Abbreviations: ASIR = Age-standardized incidence rate; ASMR = Age-standardized mortality rate; ASDR = Age-standardized DALY rate; DALYs = Disability-adjusted life years.
